# Supplementary material
Source: ML conference proceedings conference paper supplement (https://openaccess.thecvf.com/content/CVPR2025/html/Vayani_All_Languages_Matter_CVPR_2025_paper.html)
Supplement: Supplementary file 1 [file Vayani_All_Languages_Matter_CVPR_2025_supplemental.pdf]

# All Languages Matter: Evaluating LMMs on Culturally Diverse 100 Languages (Supplementary Material)

## A. ALM-Bench Categories

Our ALM-bench benchmark dataset consists of 19 categories. Among these categories, we include *Food*, *Lifestyle*, *Religion*, *Architecture*, *Sports*, *Customs* and *Heritage* from [?] with some minor modifications to it. We further include six additional categories including *Literature*, featuring prominent authors, poets, and their notable works; *Music*, showcasing traditional music and dance through visual samples; *Festivals*, covering major cultural celebrations; *Economy*, representing local industries and businesses; *Media*, highlighting cultural icons, entertainment figures, and popular TV shows; and *Notable Key Figures*, featuring influential historical leaders who serve as representatives for country-language association. Table A. 1 entails all our ALM-bench categories.

Following [?], we adopt an approach to group cultural attributes based on the country for each language. Additionally, we group culturally grounded elements representing shared knowledge, values, and objectives among the people in that culture that are collectively understood. We curated a culturally diverse dataset by collecting data from many cultural aspects (see Fig. A. 1) and manually curated the caption for each image from web-sources. We also show the most frequent words from these categories in Fig. A. 15.

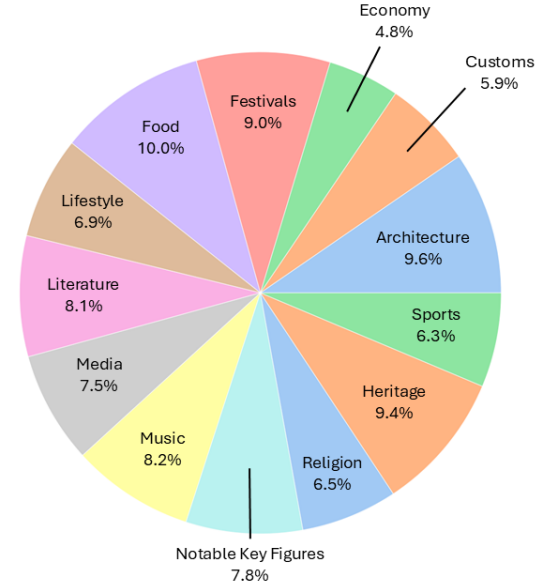

Fig. A. 1. A breakdown of the cultural categories from our ALM-bench is depicted. We ensure consistent samples across all subsets, except for the *Economy* category, where culturally unique images were challenging to find. These visual and question-answer samples are verified and filtered by the native speakers, removing any culturally irrelevant and redundant information.

## B. Annotators Demographics

Our ALM-bench is the most comprehensive benchmark to date, capturing cultural nuances across 100 languages. Since building such large-scale datasets is challenging, especially due to the limited availability of high-quality native language samples, we enlisted over 60 volunteers to provide expert feedback on our curated examples. In addition to our in-house team, we collaborated with multilingual research communities to bring in external volunteers. These volunteers, representing 50 different countries, bring a deep understanding of their languages' cultural elements and insights unique to their country-language pairs.

Each annotator was given detailed instructions along with examples to guide them in curating high-quality datasets. We also hosted a UI interface as well as gave them

### ALM-bench Categories

|                |                         |
|----------------|-------------------------|
| 1. Indoor      | 11. Music               |
| 2. Outdoor     | 12. Customs             |
| 3. Food Items  | 13. Festivals           |
| 4. Memes       | 14. Heritage            |
| 5. Painting    | 15. Economy             |
| 6. Sketch      | 16. Media               |
| 7. Food        | 17. Architecture        |
| 8. Lifestyle   | 18. Sports              |
| 9. Religion    | 19. Notable Key Figures |
| 10. Literature |                         |

Table A. 1. The 19 categories present in our ALM-bench dataset. Note that *Food Items* and *Food* appear in both generic and cultural categories, but have a different context as described in Sec. E.

|                                                                                                                                                                                                                                                                                                                                                                                                                                                                                                                                                                             |                                                                                                                                                                                                                                                                                                                                                                                                                                                                                                                                                                                         |
|-----------------------------------------------------------------------------------------------------------------------------------------------------------------------------------------------------------------------------------------------------------------------------------------------------------------------------------------------------------------------------------------------------------------------------------------------------------------------------------------------------------------------------------------------------------------------------|-----------------------------------------------------------------------------------------------------------------------------------------------------------------------------------------------------------------------------------------------------------------------------------------------------------------------------------------------------------------------------------------------------------------------------------------------------------------------------------------------------------------------------------------------------------------------------------------|
| <p><b>Hindi: Devanagari Script</b></p> <p><b>Original Question:</b><br/>इस चित्र में दिखाए गए मंदिर की विशेषता क्या है?</p> <p><b>Original Answer:</b><br/>कोणार्क सूर्य मंदिर में पत्थर पर की गई जटिल नक्काशी और सूर्यदेव की समर्पित राय का अंकार प्रदर्शित है।</p> <p><b>Corrected Question:</b><br/>चित्र में दिखाया गया मंदिर कौन सी विशिष्ट विशेषता प्रदर्शित करता है?</p> <p><b>Corrected Answer:</b><br/>कोणार्क सूर्य मंदिर जटिल पत्थर की नक्काशी और भगवान सूर्य को समर्पित एक राय की आकृति को प्रदर्शित करता है।</p> <p><b>Cultural Category: Architecture</b></p> | <p><b>Japanese: Japanese Script</b></p> <p><b>Original Question:</b><br/>画像に表示されている像に描かれた歴史的人物は誰ですか？</p> <p><b>Original Answer:</b><br/>徳川家康 (オプショן: 徳川家康, 織田信長, 豊臣秀吉, 源頼朝)</p> <p><b>Corrected Question:</b><br/>画像に写っている像は、どの歴史上の人物を表していますか？</p> <p><b>Corrected Answer:</b><br/>徳川家康 (選択肢: 徳川家康, 織田信長, 豊臣秀吉, 源頼朝)</p> <p><b>Cultural Category: Notable Key Figures</b></p>                                                                                                                                                                                                           |
| <p><b>Spanish: Latin Script</b></p> <p><b>Original Question:</b><br/>¿Cuál es el monumento icónico que se muestra en la imagen conocido como?</p> <p><b>Original Answer:</b><br/>La Alcazar por Sevilla.</p> <p><b>Corrected Question:</b><br/>¿Cómo se conoce el Monumento icónico que se muestra en la imagen?</p> <p><b>Corrected Answer:</b><br/>El Alcázar de Sevilla.</p> <p><b>Cultural Category: Heritage</b></p>                                                                                                                                                   | <p><b>Sanskrit: Devanagari Script</b></p> <p><b>Original Question:</b><br/>कसिमहि दिने रामनवमी इति उल्लेख चित्रे आविष्कृतः?</p> <p><b>Original Answer:</b><br/>चैत्रे उज्ज्वलपक्षस्य नवमी । (विकल्पाः : चैत्रे उज्ज्वलपक्षस्य नवमी: 1, दीपावली, मकरसंक्रान्ति, चैत्रे कृष्णपक्षस्य पञ्चमी ।)</p> <p><b>Corrected Question:</b><br/>चित्रे दर्शित रामनवमी कसिन् दिने आवसीतः?</p> <p><b>Corrected Answer:</b><br/>चैत्रे उज्ज्वलपक्षस्य नवमी । (विकल्पाः : चैत्रे उज्ज्वलपक्षस्य नवमी: 1, दीपावली, मकरसंक्रान्ति, चैत्रे कृष्णपक्षस्य पञ्चमी ।)</p> <p><b>Cultural Category: Food</b></p> |

Fig. A. 2. Qualitative examples of various mistakes in GPT-4o translations including *semantic, cultural, language and grammatical errors*. We employ expert human-feedback to rewrite the correct translations for all samples in our ALM-bench dataset.

the option to directly use the dataset. An example of our annotation platform is shown in Fig. A. 4. Annotators who made substantial contributions are recognized as co-authors of this paper to support high-quality language verification.

We summarize the annotator demographics in Fig. A. 3. To summarize, we show the Age and Gender distribution of our volunteers (*top-left*) indicating the presence of one-fourth of Female annotators and over 46% fall in the 18-25 age limit. We show their levels of language proficiency (*top-right*). Notably, over 80% of the annotators were either native speakers or bilingual, with an additional 14.8% at a proficient level in their chosen language. This high level of expertise ensures that our cultural samples have been meticulously reviewed, filtered, and refined by knowledgeable volunteers. Additionally, we pre-select annotators who are accustomed to the cultural values of their languages. Moreover, (*bottom-left*) depicts that over 88.5% are culturally familiar with their languages, and *bottom-right* highlights that 87.9% of the annotators have lived in the country where we have crafted the cultural samples, making them ideal participants for participating in this research effort.

### C. Guidelines for Data Verification

For each country-language pair (e.g., Sri Lanka-Sinhala), QA pairs for general domains are created by translating the original English QA pairs from *LLaVA-Bench (In-the-Wild)* dataset [? ]. For cultural domains, we curate the dataset by collecting images from online sources using targeted keywords (e.g., country name, language name, cultural cate-

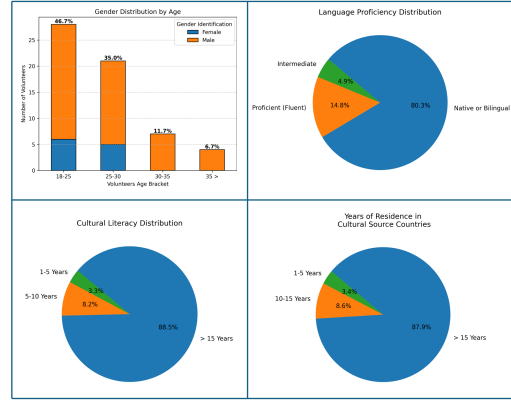

Fig. A. 3. **top-left**. depicts the Age and Gender distribution of our volunteers. We have one-fourth of the Female speakers and it is also shown that almost 48.3% of our volunteers fall in the age-bracket of 18-25. **top-right**. depicts the volunteer's native language proficiency in years. **bottom-left**. depicts the volunteer's Cultural Literacy proficiency in years. **bottom-right**. depicts the volunteer's native language proficiency in years.

gory) for each language. We also fetch meta-data along with the image, including image caption, image size, and image license. We use such information for post-processing to keep only high-quality images. Then, we perform manual filtering and blurring of personally identifiable data (PID). We discuss this step in detail in Sec. F. The cleaned images are used to generate and translate QA pairs using GPT-4o. To ensure quality, contributors with expertise in the respective native languages manually verify the cultural relevance of images, as well as the accuracy, relevance, and consistent translation of the generated QAs. This section outlines the instructions provided to contributors for verifying the relevance of questions generated for cultural domains and for reviewing the QA translations across both general and cultural domains. Additionally, we use GPT-4o as a judge to score the response and assess the accuracy of answers for cultural category images. This process is detailed further in Sec. J and K.

Each annotator is provided access to a dedicated verification platform that guides them through the list of QA pairs for the selected language (examples are presented in Sec D). Each QA pair includes the following components: Image, Category, English Question, English Answer, Translated Question, and Translated Answer. Contributors are required to follow the two steps outlined below.

**Step 1 (Question Relevance):** Verify that the question is phrased such that it cannot be answered without the use of a Vision-Language Model (VLM) analyzing the image. For example, a question like "Where is Aura Church located?" can be answered without any visual input. A more appropriate question would be, "Where is the church shown in

the image located?”

**Step 2** (Translation Verification): If the translated question or answer is incorrect, provide the correct version in the designated space and classify the error into one of the following four categories.

#### Translation Error Types

- **Semantic error:** Translation hasn’t captured the semantic meaning
- **Cultural error:** Correct but unusual words uncommon in local language context are used
- **Language error:** Translation is provided using characters from a different alphabet or most commonly not translated and still given in English
- **Grammatical error:** Grammar-related errors present

## D. Verification Platform and UI Examples

Image

English Context  
An aerial view of Diamond Head in the Hawaiian Islands.

Context  
මහලු පිඳි මුදුනේ ඔබ්බේ පිහිටි ඔබ්බේ පිහිටි ඔබ්බේ පිහිටි.

English Question  
It seems you may be asking for the name of a famous sight in a photo, but there's no photo provided. Could you please give more details or describe the sight you're asking about?

Question  
මහලු පිඳි මුදුනේ ඔබ්බේ පිහිටි ඔබ්බේ පිහිටි ඔබ්බේ පිහිටි?

English Answer  
The renowned landmark in the image is Diamond Head.

Answer  
මහලු පිඳි මුදුනේ ඔබ්බේ පිහිටි ඔබ්බේ පිහිටි ඔබ්බේ පිහිටි.

Is the above Translated question/answer a correct translation for the English question/answer?  
No

Updated Question  
Please write the correct Question

Updated Answer  
Please write the correct Answer

Mark the type of mistake in the translated sentence  
Semantic error (meaning ruined)

Submit

Previous Question Next Question

Fig. A. 4. User interface for translation verification hosted on Gradio, allowing contributors to classify incorrect entries and provide accurate translations.

## E. Image Web Searching

We automated the process of web scraping for collecting cultural images. A custom URL, embedded with our encoded search query and licensing information, is passed to the Google Search Engine, and images are downloaded from the retrieved links. For each specific cultural domain within a given country-language pair, the search query is constructed as “{language} {cultural domain description} in {country}”. For privacy and copyright

issues, our benchmark only includes images that are either in the public domain or licensed under the Creative Commons license.

#### Cultural Domain Descriptions

- **Food:** Specific Dishes, Dining Dishes
- **Lifestyle:** Daily Attire, Daily Life, Modern Lifestyle
- **Literature:** Famous literature, authors and poets
- **Music:** Traditional music and dance
- **Religion:** Major religions and religious festivals
- **Customs:** Social etiquette and traditional greetings
- **Festivals:** Important cultural festivals and celebrations
- **Heritage:** Popular historical heritage sites and iconic landmarks
- **Economy:** Major economic industries
- **Media:** Iconic Entertainment Figures and Popular TV Shows, Movies
- **Architecture:** Traditional Art and Architecture
- **Sports:** Famous traditional sports
- **Notable key figures:** Famous historical leaders

## F. Blurring the PIDs

Recent research highlights the importance of blurring personally identifiable details (PIDs) in image datasets to mitigate privacy risks and reduce bias [? ]. Thus, we filter the collected cultural images for cultural relevance, and faces are blurred using a face detection model, except for the ‘Media’ and ‘Notable Key Figures’ categories where we have images of public figures or celebrities. The blurred images are then manually reviewed to identify any discrepancies, such as blurring personally identifiable data (PIDs) and removing watermark images, and any remaining issues are addressed when using the [PicdeFacer](#) tool.

## G. Instruction Prompt for QA Generation

Fig. A. 5 illustrates the prompt messages used to guide GPT-4o in generating culturally relevant QA pairs. Each prompt includes an image, its manually added caption, and the search query used during image scraping. The model is instructed to generate two short QA pairs, two multiple-choice QA pairs, one true/false question, and one long QA pair. Detailed instructions ensure that the generated QAs are culturally grounded and specific to the image, avoiding answers based solely on common knowledge.

## H. Instruction Prompt for QA Translations

After the curation of question-answer pairs using GPT-4o, we use the same open-source model to translate the English

```

prompt_messages = [
    { "role": "user", "content": [ { "type": "text", "text": search_query + "\n" + caption }, { "type": "image_url", "image_url": image_url } ] },
    { "role": "system", "content": f""Here is an image and a caption I have on hand. I'd like you to generate two short questions and answers, two multiple choice questions and answers, one true/false question, and one long question and answer. Refer to the caption for the context/hint. Take into account the cultural diversity of cultural category.

Follow the following rules while designing questions and answers:

1. The question must be answerable only by looking at the image.
2. Ensure that the questions are culturally relevant and specific to the image.
3. Provide answers that are concise, accurate, and directly related to the question.
4. You will also need to provide 1 correct option and 3 other incorrect options (distractors).
   For the distractors, choose options that are relevant, not obvious wrong answers.
5. The question must be answerable even without the multiple-choice.
   Example of the invalid question: ("What song is not performed by this musician" – not answerable if you don't know the choices).
6. Make sure the questions are written fluently in English.
7. Be mindful of cultural sensitivities and avoid stereotyping or misrepresenting cultural aspects.
8. Ensure there are variations in your questions. Identity questions are fine, eg "What is this", or "where is this". But additionally.
   For example, multi-hop reasoning, counting, referencing, or questions that require local commonsense knowledge to be answered.
9. Just generate these in English.
10. For short questions and answers, don't keep it very short, include at least 2 sentences.
11. Make the questions distinct and unique from each other.

Give the answers in the following JSON format and make sure to only output a valid JSON,

{ "short_questions": [ { "question": <question>, "answer": <answer> } ],
  "multiple_choice_questions": [ { "question": <question>, "answer": <answer>, "options": <4 options> } ],
  "true_false_question": { "question": <question>, "answer": <answer> },
  "long_question": { "question": <question>, "answer": <answer> } "" }
]

```

Fig. A. 5. Prompts used for generation of cultural QA pairs. *search\_query* refers to the query used to search the image online. It includes language, country and cultural category details. *caption* is a manually added textual description specific to the image. *cultural category* indicates the domain to which the image belongs, selected from the 13 cultural domains in our ALM-bench dataset.

QA pairs into the native languages. We show the prompt that we used for this task in Fig. A. 6.

```

prompt_messages = [
    { "role": "system", "content": f"You're a helpful assistant that translates English text to target_lang"},
    { "role": "user", "content": English_input }
]

```

Fig. A. 6. Prompts used for translating cultural QAs using GPT-4o. *English\_input* refers to either the English question or answer to be translated into the *target\_lang*, the desired target language.

## I. Instruction Prompt for LMM Answer Generation

We conduct a comprehensive study by evaluating various state-of-the-art Large Multimodal Models (LMMs), including both open-weight and closed-weight models, on our ALM-bench benchmark. We used different prompts for each question type as shown in Fig. A. 7. We prompt all questions with English system instruction as highlighted by [?] , suggesting that the use of prompts in English results in the best performance. Finally, we score each model's generated answer with the human-annotated ground truth an-

swers through a scoring system to assess each model's performance on the benchmark.

## J. Prompts for GPT-Scoring

In addition to using GPT-4o as a judge in scoring the predicted answers, we also do scoring with multiple other LMMs to ensure a fair evaluation. Results are reported in Table A. 2.

| Model Name     | GPT-4o | Llama-3.1-8B-Instruct |
|----------------|--------|-----------------------|
| GPT-4o         | 90.16% | 90.34%                |
| Gemini-1.5 Pro | 80.21% | 80.65%                |
| GLM-4V-9B      | 71.35% | 73.89%                |

Table A. 2. We evaluated decision-making questions (both True/-False and multiple-choice) across a sample of 20 randomly selected languages using the Llama-3.1-8B-Instruct model. This assessment aims to ensure consistency in performance on T/F and MCQs when scored using GPT-4o as a judge.

## K. Guidelines for Error Analysis on GPT-4o Output

Each annotator is provided with an Excel file specific to a given country-language pair, containing the following columns: Image URL, Question, Ground Truth Answer,

```

messages = [{"role": "user", "content": [{"type": "image_url",
"image_url": image_url }, {"type": "text", "text": prompt}]}]

Multiple Choice Questions

prompt = (
    f "For the given the Multiple Choice Question Answer below, analyze the
    question and answer strictly from one of the options below. Strictly answer the
    choice only. No additional text." + question + choices
)

True/False Questions

prompt = (
    question + f "The above question is a True/False question. Please provide the
    answer as one word in target_language"
)

Long Questions

prompt = (
    question + f "Answer the question in detail in target_language language"
)

Short Questions

prompt = (
    question + f "Please provide brief, clear responses in target_language language"
)

```

Fig. A. 7. Prompts used to generate answers for cultural questions using multiple Large Multimodal Models evaluated in our study. Different prompts are designed for different question types. *question* refers to the cultural question associated with the given image, previously generated using GPT-4o. *choices* represents the four options provided in multiple choice question type, and *target\_language* is the desired local language for the response.

Predicted Answer (all in the native language), and GPT-4o Score. The ‘Predicted Answer’ column records the response generated by GPT-4o when presented with the Question in the native language. The ‘GPT-4o Score’ column reflects the evaluation score assigned by GPT-4o, acting as a judge, based on the comparison between the Predicted Answer and the Ground Truth Answer.

Each annotator is required to complete two additional columns: (1) ‘Is the GPT Score Justified?’ with a binary response Yes/No, and (2) if the GPT-4o score is not justified, the ‘Reason for GPT-4o Failure’ column, where they select an appropriate reason from a predefined dropdown menu provided below.

```

messages = [{"role": "system", "content": "You are a helpful Assistant. Provide helpful
response to the user's question."}, {"role": "user", "content": prompt_eval}]

True/False & Multiple Choice Questions

prompt_eval = (
    f "Evaluate the following answer based on Accuracy:"
    f "Question: {question}"
    f "Ground Truth: {ground_truth}"
    f "Model Prediction: {predicted_answer}"
    f "Match the meaning of ground truth with model prediction, if it matches give a 10. Otherwise 0."
    f "Strictly return only the numeric score, without any additional commentary." )

Long Questions

prompt_eval = (
    f "Evaluate the following answer based on Consistency, Fluency, and Relevance based on the
    Ground Truth answer."
    f "A high score example when predicted response match closely with ground truth and a low
    score example when predicted response lacks knowledge, or is not related to the ground truth."
    f "Question: {question}"
    f "Ground Truth: {ground_truth}"
    f "Model Prediction: {predicted_answer}"
    f "Provide a single overall score out of 10 based on these three criteria."
    f "Strictly return only the numeric score, without any additional commentary." )

Short Questions

prompt_eval = (
    f "Evaluate the following answer based on accuracy and correctness based on the Ground
    Truth answer."
    f "A high score example when predicted response match closely with ground truth and a low
    score example when predicted response lacks knowledge, or is not related to the ground truth."
    f "Question: {question}"
    f "Ground Truth: {ground_truth}"
    f "Model Prediction: {predicted_answer}"
    f "Provide a single overall score out of 10 based on these three criteria."
    f "Strictly return only the numeric score, without any additional commentary." )

```

Fig. A. 8. Prompts used to generate a score between 0 and 10, with GPT-4o acting as the evaluator to compare an LMM’s predicted answers against ground truth answers. The terms *question*, *ground\_truth*, and *predicted\_answer* refer to the cultural question, the ground truth answer generated by GPT-4o and verified by experts, and the model’s predicted answer, respectively.

#### Reason for GPT-4o Failure

- **Lack of Knowledge:** The model fails to find an answer to the question.
- **Lack of Cultural Understanding:** The model fails to understand the cultural aspect of the answer.
- **Language Error:** Some words in the GPT-4o’s output are wrong for the language.
- **Reasoning Error:** The reason it gave does not match that language.
- **Translation Error:** A few native words were not properly translated.
- **Perceptual Error:** The model fails to understand where a certain entity is (for eg, the top of the image, the bottom of the image, etc).

## L. Qualitative examples with different question types

Next, we present some qualitative examples showing various question types for each image sample from our dataset and in Fig. A. 9, A. 10, A. 11, A. 11, A. 13, and A. 14.



|                                                                                                                                                                                                                                                      |                                                                                                                                                                                                                                                                                                                                                                                                                                                                                                                                                                                                                                                                                                                                                                                                                                                                                                                                                                                                                                                                                                                                                                    |                                                                                                                                                                                                                                                                                                                                                                                                                                                                                                                                                                                                                                                                                                                                                                                                                                                                                                                                                                                                                                                                                                                                                                                                                                                                                                                                                                                                                                                                                                                                                                                                         |
|------------------------------------------------------------------------------------------------------------------------------------------------------------------------------------------------------------------------------------------------------|--------------------------------------------------------------------------------------------------------------------------------------------------------------------------------------------------------------------------------------------------------------------------------------------------------------------------------------------------------------------------------------------------------------------------------------------------------------------------------------------------------------------------------------------------------------------------------------------------------------------------------------------------------------------------------------------------------------------------------------------------------------------------------------------------------------------------------------------------------------------------------------------------------------------------------------------------------------------------------------------------------------------------------------------------------------------------------------------------------------------------------------------------------------------|---------------------------------------------------------------------------------------------------------------------------------------------------------------------------------------------------------------------------------------------------------------------------------------------------------------------------------------------------------------------------------------------------------------------------------------------------------------------------------------------------------------------------------------------------------------------------------------------------------------------------------------------------------------------------------------------------------------------------------------------------------------------------------------------------------------------------------------------------------------------------------------------------------------------------------------------------------------------------------------------------------------------------------------------------------------------------------------------------------------------------------------------------------------------------------------------------------------------------------------------------------------------------------------------------------------------------------------------------------------------------------------------------------------------------------------------------------------------------------------------------------------------------------------------------------------------------------------------------------|
| <div data-bbox="292 388 535 472"> <p><b>Language: Urdu</b><br/><b>Category: Festivals</b></p> </div> <div data-bbox="190 495 634 783">  </div>                      | <div data-bbox="667 312 1015 340"> <p><b>Multiple Choice Question Answers</b></p> </div> <div data-bbox="667 350 1036 489"> <p><b>Ques:</b> تصویر میں کون سا جانور نمایاں طور پر دکھایا گیا ہے؟<br/>(What animal is prominently featured in the image?)<br/><b>Options:</b><br/>A) گھوڑا Horse<br/>B) اونٹ Camel<br/>C) ہاتھی Elephant<br/>D) مویشی Cattle</p> </div> <div data-bbox="667 514 1036 669"> <p><b>Ques:</b> تصویر میں کون سے موسیقی کے آلات نظر آ رہے ہیں؟<br/>(What kind of musical instruments are visible in the image?)<br/><b>Options:</b><br/>A) ڈھول Drums<br/>B) بانسری Flute<br/>C) ستار Sitar<br/>D) طبلا Tabla</p> </div> <div data-bbox="667 688 1036 821"> <p><b>True/False</b><br/><b>Ques:</b> لوگ تقریب کے دوران اپنے گھوڑوں کے ساتھ چل رہے ہیں؟<br/>(People are walking with their horses during the event shown in the image?)<br/><b>Ans:</b> صحیح (TRUE)</p> </div> <div data-bbox="667 831 1036 951"> <p><b>Short Question Answer</b><br/><b>Ques:</b> تصویر میں کس قسم کا شو دکھایا گیا ہے؟<br/>(What type of show is depicted in the image?)<br/><b>Ans:</b> گھوڑوں اور مویشیوں کا شو<br/>(A horse and cattle show)</p> </div> | <div data-bbox="1050 312 1279 340"> <p><b>Long Question Answer</b></p> </div> <div data-bbox="1050 350 1446 489"> <p><b>Ques:</b> پاکستانی ثقافت میں گھوڑے اور مویشیوں کے شوز کی اہمیت پر تبادلہ خیال کریں، جن میں عموماً ہونے والے واقعات، ان کا مقامی برادریوں پر اثر اور وہ کس طرح ثقافتی ورثے کو فروغ دیتے ہیں۔<br/>(Discuss the significance of horse and cattle shows in Pakistani culture, including the types of events that typically take place, their impact on local communities, and how they promote cultural heritage.)</p> </div> <div data-bbox="1050 506 1446 758"> <p><b>Ans:</b> پاکستانی ثقافت میں گھوڑے اور مویشیوں کے شوز اہم تقریبات ہیں جو کمیونٹی کی زراعتی مہارت اور مویشی پالنے کی صلاحیتوں کو ظاہر کرتی ہیں۔ ان تقریبات میں عام طور پر مختلف مقابلے شامل ہوتے ہیں، جن میں بہترین نسل کے مقابلے، جانوروں کی پرید، اور پرفارمنس شوز جیسے گھوڑوں کا رقص شامل ہیں۔ یہ شوز کسانوں اور بریڈرز کو اپنے بہترین جانوروں کو پیش کرنے کا پلیٹ فارم فراہم کرتے ہیں، مقامی زرعی کاروبار کو فروغ دیتے ہیں اور مویشیوں کی نسل بڑھانے کے معیار کو بہتر بنانے کی حوصلہ افزائی کرتے ہیں۔ اقتصادی پہلو سے بٹ کر، یہ تہوار ثقافتی مظہروں سے بھرپور ہوتے ہیں، جن میں روایتی موسیقی، رقص، اور شاندار سجائوش شامل ہوتی ہیں۔ یہ کمیونٹی کو قریب لاتے ہیں اور ثقافتی ورثے کے تحفظ کی ترغیب دیتے ہیں، شرکاء اور ناظرین دونوں کے لئے ایک تفریحی اور تعلیمی تجربہ فراہم کرتے ہیں۔</p> </div> <div data-bbox="1050 867 1446 951"> <p><b>Ques:</b> یہ تقریب کس شہر میں ہو رہی ہے؟<br/>(In which city is this event taking place?)<br/><b>Ans:</b> لاہور<br/>(Lahore)</p> </div>                          |
| <div data-bbox="219 1123 609 1207"> <p><b>Language: Chinese(Simplified)</b><br/><b>Category: Lifestyle</b></p> </div> <div data-bbox="274 1224 548 1644">  </div> | <div data-bbox="667 1035 1015 1062"> <p><b>Multiple Choice Question Answers</b></p> </div> <div data-bbox="667 1073 1036 1211"> <p><b>Ques:</b> 这个人头上戴着什么？<br/>(What is this person wearing on her head?)<br/><b>Options:</b><br/>A) 凤冠 FengGuan<br/>B) 贝雷帽 Beret<br/>C) 头纱 Veil<br/>D) 头盔 Helmet</p> </div> <div data-bbox="667 1234 1036 1373"> <p><b>Ques:</b> 图片中描绘的是哪种文化服饰？<br/>(Which cultural attire is depicted in the image?)<br/><b>Options:</b><br/>A) 现代汉服 Modern Chinese Hanfu<br/>B) 和服 Kimono<br/>C) 纱丽 Sari<br/>D) 韩服 Hanbok</p> </div> <div data-bbox="667 1404 1036 1537"> <p><b>True/False</b><br/><b>Ques:</b> 图片中的衣服是传统汉服吗？<br/>(Is the clothing in the image traditional Chinese Hanfu?)<br/><b>Ans:</b> 是的，是传统汉服。( True, it is traditional Chinese Hanfu. )</p> </div> <div data-bbox="667 1551 1036 1711"> <p><b>Short Question Answer</b><br/><b>Ques:</b> 图片中描绘的是哪种风格的婚纱？<br/>(What type of clothing is the person in this image wearing?)<br/><b>Ans:</b> 那个人穿着现代汉服。<br/>(The person is wearing modern Chinese Hanfu clothing.)</p> </div>                                                                                              | <div data-bbox="1050 1035 1279 1062"> <p><b>Long Question Answer</b></p> </div> <div data-bbox="1050 1073 1446 1188"> <p><b>Ques:</b> 描述图片中的服装上的具体元素和图案，并解释现代汉服在当代中国社会中的文化意义<br/>(Describe the specific elements and patterns seen on the outfit in the image and explain the cultural significance of modern Hanfu attire in contemporary Chinese society.)</p> </div> <div data-bbox="1050 1188 1446 1318"> <p><b>Ans:</b> 图片中的服装有一件白色外衣，宽袖口和一件红色内衣，内衣包括一条高腰裙子和一件有花卉图案的上衣。上衣上的花卉刺绣为整个服装增添了精致的细节。现代汉服虽然起源于传统文化，但在当代社会中得到了复兴。许多中国年轻人以穿戴汉服的方式与自己的文化遗产建立联系，表达文化自信。这种流行的复苏在各种文化节日、社交媒体和汉服社区中都有所体现，热爱汉服的人士在这些平台上分享对这种复杂而意义深远的服饰的热情。</p> </div> <div data-bbox="1050 1333 1446 1497"> <p>(The outfit in the image features a white outer garment with wide sleeves and a red inner garment composed of a high-waisted skirt and a floral top. The floral embroidery on the top adds elaborate detail to the ensemble. Modern Hanfu attire, while rooted in traditional Chinese culture, has seen a revival in contemporary society. Many young people in China embrace Hanfu as a way to connect with their heritage and express cultural pride. This resurgence in popularity is also evident in various cultural festivals, social media, and Hanfu communities, where individuals share their passion for this intricate and significant form of attire.)</p> </div> <div data-bbox="1050 1587 1446 1671"> <p><b>Ques:</b> 这个人穿的衣服主要是什么颜色？<br/>(What colors are predominant in the person's outfit?)<br/><b>Ans:</b> 衣服主要是红色和白色。<br/>(The outfit predominantly features red and white colors.)</p> </div> |

Fig. A. 9. Qualitative examples of various question types in Urdu and Chinese Simplified Language.

|                                                                                                                                                                                            |                                                                                                                                                                                                                                                                                                                                                                                                                                                                                                                                                                                                                                                                                                                                                                                                                                                                                                                                                                                                                                                                                                                                                                                                                                                                                                                                                                                                                                                                                                                                                                                                                                                                                                                                                                                                                                                                                                                                                                                                                                                                                                                                                                                                                                                               |
|--------------------------------------------------------------------------------------------------------------------------------------------------------------------------------------------|---------------------------------------------------------------------------------------------------------------------------------------------------------------------------------------------------------------------------------------------------------------------------------------------------------------------------------------------------------------------------------------------------------------------------------------------------------------------------------------------------------------------------------------------------------------------------------------------------------------------------------------------------------------------------------------------------------------------------------------------------------------------------------------------------------------------------------------------------------------------------------------------------------------------------------------------------------------------------------------------------------------------------------------------------------------------------------------------------------------------------------------------------------------------------------------------------------------------------------------------------------------------------------------------------------------------------------------------------------------------------------------------------------------------------------------------------------------------------------------------------------------------------------------------------------------------------------------------------------------------------------------------------------------------------------------------------------------------------------------------------------------------------------------------------------------------------------------------------------------------------------------------------------------------------------------------------------------------------------------------------------------------------------------------------------------------------------------------------------------------------------------------------------------------------------------------------------------------------------------------------------------|
| <div data-bbox="289 405 537 491"> <p><b>Language: Hindi</b><br/><b>Category: Heritage</b></p> </div>      | <div data-bbox="667 310 1013 338"> <p><b>Multiple Choice Question Answers</b></p> </div> <div data-bbox="667 346 1040 512"> <p><b>Ques:</b> चित्र में दिखाए गए किले का नाम क्या है?<br/>(What is the name of the fort shown in the image?)<br/><b>Options:</b><br/>A) लाल किला Red Fort<br/>B) अम्बर किला Amber Fort<br/>C) आगरा किला Agra Fort<br/>D) ग्वालियर किला Gwalior Fort</p> </div> <div data-bbox="667 520 1040 678"> <p><b>Ques:</b> लाल किला किस शहर में स्थित है?<br/>(In which city is the Red Fort located?)<br/><b>Options:</b><br/>A) नई दिल्ली New Delhi<br/>B) जयपुर Jaipur<br/>C) आगरा Agra<br/>D) लखनऊ Lucknow</p> </div> <div data-bbox="667 686 1040 833"> <p><b>True/False</b><br/><b>Ques:</b> क्या चित्र में दिखाया गया किला लाल बलुआ पत्थर से बना है?<br/>(Is the fort in the image constructed using red sandstone?)<br/><b>Ans:</b> सही (TRUE)</p> </div> <div data-bbox="667 842 1040 972"> <p><b>Short Question Answer</b><br/><b>Ques:</b> यह ऐतिहासिक स्थल कहाँ स्थित है?<br/>(Where is this historic site located?)<br/><b>Ans:</b> नई दिल्ली, भारत।<br/>(New Delhi, India.)</p> </div> <div data-bbox="1047 310 1279 338"> <p><b>Long Question Answer</b></p> </div> <div data-bbox="1047 346 1453 842"> <p><b>Ques:</b> लाल किले के ऐतिहासिक महत्व पर चर्चा करें, जिसमें मुगल युग के दौरान इसकी भूमिका, इसकी वास्तुकला विशेषताएँ और आधुनिक भारत में इसका महत्व शामिल हैं।<br/><br/>(Discuss the historical significance of the Red Fort, including its role during the Mughal era, its architectural features, and its importance in modern India.)</p> <p><b>Ans:</b><br/>लाल किला, जो नई दिल्ली में स्थित है, का निर्माण मुगल सम्राट शाहजहाँ ने 17वीं सदी के मध्य में करवाया था। यह लगभग 200 वर्षों तक मुगल सम्राटों का मुख्य आवास रहा। किला मुगल वास्तुकला का प्रतीक है, जिसे इसकी विशाल लाल बलुआ पत्थर की दीवारों और जटिल डिजाइनों द्वारा पहचाना जाता है। मुगल युग के दौरान, यह एक राजनीतिक और सांस्कृतिक केंद्र के रूप में भारतीय इतिहास में महत्वपूर्ण भूमिका निभाता था। आधुनिक समय में, लाल किला उस स्थल के रूप में महत्वपूर्ण है जहाँ हर साल स्वतंत्रता दिवस पर भारत के प्रधानमंत्री राष्ट्रीय ध्वज फहराते हैं और भाषण देते हैं, जो भारत के इतिहास और संस्कृति में किले की स्थायी विरासत का प्रतीक है।</p> </div> |
| <div data-bbox="289 1108 537 1194"> <p><b>Language: Sinhala</b><br/><b>Category: Sports</b></p> </div>  | <div data-bbox="667 1029 1013 1056"> <p><b>Multiple Choice Question Answers</b></p> </div> <div data-bbox="667 1064 1040 1241"> <p><b>Ques:</b> ඡායාරූපයේ දක්වා ඇති ශ්‍රී ලංකාවේ පුරාණ සටන් කුමක්ද?<br/>(What ancient martial art from Sri Lanka is shown in the image?)<br/><b>Options:</b><br/>A) අංගම්පොර Angampora<br/>B) කලාරිපයට්තු Kalaripayattu<br/>C) මුයි නායි Muay Thai<br/>D) තයිකොන්ඩො Taekwondo</p> </div> <div data-bbox="667 1249 1040 1421"> <p><b>Ques:</b> ඡායාරූපය අනුව මෙම සටන්කලාවේ භාවිතා වන අවි වර්ගය මින් කුමක්ද?<br/>(Which of these weapons is used in angampora according to the image?)<br/><b>Options:</b><br/>A) ෂූරිකේන් Shuriken<br/>B) නන්චක්කු Nunchaku<br/>C) බෝ රිට් Bo Staff<br/>D) කඩු Swords</p> </div> <div data-bbox="667 1430 1040 1541"> <p><b>True/False</b><br/><b>Ques:</b> ඡායාරූපයේ පෙන්වුම් කර ඇති සම්මතය සම්ප්‍රදායික ශ්‍රී ලංකාවේ සටන් කලාවකි.<br/>(The image shows a form of traditional Sri Lankan martial arts.)<br/><b>Ans:</b> ඔව්(TRUE)</p> </div> <div data-bbox="667 1558 1040 1711"> <p><b>Short Question Answer</b><br/><b>Ques:</b> ඡායාරූපයේ දක්වා ඇති සටන් කලාව කුමක්ද?<br/>(What martial art is being demonstrated in the image?)<br/><b>Ans:</b> අංගම්පොර.<br/>(Angampora.)</p> </div> <div data-bbox="1047 1029 1279 1056"> <p><b>Long Question Answer</b></p> </div> <div data-bbox="1047 1064 1453 1711"> <p><b>Ques:</b> ඡායාරූපයේ දක්වා ඇති සටන්කලාවේ ප්‍රධාන සංරචක දෙක විස්තර කර සහ එම සංරචකවල වැදගත්කම පැහැදිලි කරන්න.<br/>(Describe the two main components of angampora depicted in the image and explain their significance in the martial art.)</p> <p><b>Ans:</b><br/>අංගම්පොරයේ 'අංගම්' හා 'ඉල්ලංගම්' යන ප්‍රධාන සංරචක දෙක අන්තර්ගත වේ. 'අංගම්' යනු අන්වේදී සටන් කිරීමයි. 'ඉල්ලංගම්' යනු කඩු සහ අනෙකුත් ආයුධ ප්‍රයෝජනයට ගැනීමයි. මෙම අංග ආන්මාරක්ශාව සඳහා වැදගත් වනවා මෙන්ම, අතින් කරන සටන් නමුත් වේගවත්බව හා නම් කුසලතාව වැඩිදියුණු කරනවා මෙන්ම, ආයුධ වලින් කරන සටන්, සටන් කලාවට නව මානයක් එක් කරයි.</p> <p><b>Ques:</b> සටන් කටයුතුවලට අමතරව අංගම්පොර වල ප්‍රගුණ කරන ක්‍රියාව කුමක්ද?<br/>(What distinct activity apart from combat is integrated into angampora?)<br/><b>Ans:</b> භාවනාව.<br/>(Meditation.)</p> </div>                                                     |

Fig. A. 10. Qualitative examples of various question types in Hindi and Sinhala Language.

|                                                                                                                                                                                                                                                   |                                                                                                                                                                                                                                                                                                                                                                                                                                                                                                                                                                                                                                                                                                                                                                                                                                                                                                                                                                                                                                                                                                                                                                                                                                                                                                                                                                                                                                                                                                                                                                |                                                                                                                                                                                                                                                                                                                                                                                                                                                                                                                                                                                                                                                                                                                                                                                                                                                                                                                                                                                                                                                                                                                                                                                                                                                                                                                                                                                                                                                                                                                                                                                                                                                                                                                                                                                                                                                                                                                                      |
|---------------------------------------------------------------------------------------------------------------------------------------------------------------------------------------------------------------------------------------------------|----------------------------------------------------------------------------------------------------------------------------------------------------------------------------------------------------------------------------------------------------------------------------------------------------------------------------------------------------------------------------------------------------------------------------------------------------------------------------------------------------------------------------------------------------------------------------------------------------------------------------------------------------------------------------------------------------------------------------------------------------------------------------------------------------------------------------------------------------------------------------------------------------------------------------------------------------------------------------------------------------------------------------------------------------------------------------------------------------------------------------------------------------------------------------------------------------------------------------------------------------------------------------------------------------------------------------------------------------------------------------------------------------------------------------------------------------------------------------------------------------------------------------------------------------------------|--------------------------------------------------------------------------------------------------------------------------------------------------------------------------------------------------------------------------------------------------------------------------------------------------------------------------------------------------------------------------------------------------------------------------------------------------------------------------------------------------------------------------------------------------------------------------------------------------------------------------------------------------------------------------------------------------------------------------------------------------------------------------------------------------------------------------------------------------------------------------------------------------------------------------------------------------------------------------------------------------------------------------------------------------------------------------------------------------------------------------------------------------------------------------------------------------------------------------------------------------------------------------------------------------------------------------------------------------------------------------------------------------------------------------------------------------------------------------------------------------------------------------------------------------------------------------------------------------------------------------------------------------------------------------------------------------------------------------------------------------------------------------------------------------------------------------------------------------------------------------------------------------------------------------------------|
| <div data-bbox="292 388 532 468"> <p><b>Language: Italian</b><br/><b>Category: Music</b></p> </div> <div data-bbox="219 493 604 783">  </div>                    | <div data-bbox="662 296 1024 323"> <p><b>Multiple Choice Question Answers</b></p> </div> <div data-bbox="662 333 1036 531"> <p><b>Ques:</b> Quali abiti tradizionali indossano i ballerini nell'immagine?<br/>(What traditional clothing are the dancers wearing in the image?)<br/><b>Options:</b><br/>A) Costumi tradizionali folcloristici italiani<br/><b>Traditional Italian folk costumes</b><br/>B) Gonne scozzesi Scottish kilts<br/>C) Kimoni giapponesi Japanese kimonos<br/>D) Sari indiani ndian sarees)</p> </div> <div data-bbox="662 537 1036 789"> <p><b>Ques:</b> Quale tipo di accompagnamento musicale è probabilmente presente in questo evento di danza tradizionale?<br/>(What kind of musical accompaniment is likely present in this traditional dance event?)<br/><b>Options:</b><br/>A) Musica folcloristica dal vivo con strumenti come la fisarmonica o il violino. (Live folk music from instruments like the accordion or violin)<br/>B) Rock band (Rock band)<br/>C) Ensemble di jazz (Jazz ensemble)<br/>D) Orchestra sinfonica classica (Classical symphony orchestra)</p> </div> <div data-bbox="662 827 870 852"> <p><b>Short Question Answer</b></p> </div> <div data-bbox="662 863 1036 999"> <p><b>Ques:</b> Che tipo di evento potrebbe rappresentare l'immagine?<br/>(What kind of event does the image likely depict?)<br/><b>Ans:</b> L'immagine probabilmente rappresenta un evento di danza folcloristica italiana tradizionale.<br/>(The image likely depicts a traditional Italian folk dance event.)</p> </div> | <div data-bbox="1047 296 1279 323"> <p><b>Long Question Answer</b></p> </div> <div data-bbox="1047 333 1446 682"> <p><b>Ques:</b> Descrivi gli elementi dell'abbigliamento e della danza tradizionali italiani raffigurati nell'immagine, compresi i dettagli sull'abbigliamento, i movimenti della danza e il significato culturale di tali performance.<br/>( Describe the elements of traditional Italian dress and dance depicted in the image, including details about the attire, the dance moves, and the cultural significance of such performances.)<br/><b>Ans:</b><br/>L'immagine mostra ballerini in costumi tradizionali folcloristici italiani, che comprendono elementi come gilet ricamati, grembiuli colorati e gonne con bordi di pizzo per le donne, e cappelli a tesa larga e bandane per gli uomini. I movimenti della danza includono passi e gesti sincronizzati, spesso con l'uso di mani o fazzoletti. Queste performance sono culturalmente significative perché rappresentano tradizioni regionali, celebrano eventi storici e mantengono viva l'eredità culturale trasmettendola di generazione in generazione. Tali eventi sono spesso accompagnati da musica dal vivo, suonata con strumenti tradizionali come la fisarmonica o il violino, che arricchiscono l'atmosfera festosa..</p> </div> <div data-bbox="1047 703 1159 730"> <p><b>True/False</b></p> </div> <div data-bbox="1047 739 1446 814"> <p><b>Ques:</b> L'immagine mostra una performance di danza moderna?<br/>Does the image show a modern dance performance?)<br/><b>Ans:</b> Falso (False)</p> </div> <div data-bbox="1047 863 1446 959"> <p><b>Ques:</b> Cosa tengono in mano i ballerini nell'immagine?<br/>(What are the dancers in the image holding in their hands?)<br/><b>Ans:</b> I ballerini nell'immagine tengono fazzoletti in mano.<br/>(The dancers in the image are holding handkerchiefs in their hands.)</p> </div> |
| <div data-bbox="227 1102 592 1182"> <p><b>Language: German</b><br/><b>Category: Notable Key Figures</b></p> </div> <div data-bbox="279 1213 544 1560">  </div> | <div data-bbox="662 1024 1024 1052"> <p><b>Multiple Choice Question Answers</b></p> </div> <div data-bbox="662 1062 1036 1276"> <p><b>Ques:</b> Welche politische Partei wurde von der Person auf dem Bild angeführt?<br/>(Which political party was led by the person in the image?)<br/><b>Options:</b><br/>A) NSDAP (Nazi Party)<br/>B) Kommunistische Partei (Communist Party)<br/>C) Sozialdemokratische Partei (Social Democratic Party)<br/>D) Christlich-Demokratische-Union (Christian Democratic Union)</p> </div> <div data-bbox="662 1285 1036 1457"> <p><b>Ques:</b> Welcher Krieg wird mit der Führung der Person auf dem Bild in Verbindung gebracht?<br/>(Which war is associated with the leadership of the person in the image?)<br/><b>Options:</b><br/>A) Zweiter Weltkrieg (World War II)<br/>B) Erster Weltkrieg (World War I)<br/>C) Kalter Krieg (Cold War)<br/>D) Koreakrieg (Korean War)</p> </div> <div data-bbox="662 1465 873 1491"> <p><b>Short Question Answer</b></p> </div> <div data-bbox="662 1499 1036 1556"> <p><b>Ques:</b> Wer ist der Nazi-Führer auf diesem Bild?<br/>(Who is the Nazi leader depicted in this image?)<br/><b>Ans:</b> Adolf Hitler (Adolf Hitler)</p> </div> <div data-bbox="662 1564 1036 1703"> <p><b>Ques:</b> In welchem Zeitraum regierte der Führer auf dem Bild Deutschland?<br/>(During what period did the leader in the image rule Germany?)<br/><b>Ans:</b> Adolf Hitler regierte Deutschland von 1933 bis 1945..<br/>(Adolf Hitler ruled Germany from 1933 to 1945.)</p> </div>          | <div data-bbox="1047 1024 1279 1052"> <p><b>Long Question Answer</b></p> </div> <div data-bbox="1047 1062 1446 1547"> <p><b>Ques:</b> Erörtern Sie die Auswirkungen und Konsequenzen der Herrschaft Adolf Hitlers auf Deutschland und die Welt, einschließlich der Ereignisse des Zweiten Weltkriegs und des Holocausts.<br/>(Discuss the impact and consequences of Adolf Hitler's rule on Germany and the world, including the events of World War II and the Holocaust.)<br/><b>Ans:</b><br/>Die Herrschaft Adolf Hitlers hatte tiefgreifende und verheerende Auswirkungen auf sowohl Deutschland als auch die Welt. Als Führer des Nazi-Deutschlands führten Hitlers aggressive expansionistische Politiken direkt zum Ausbruch des Zweiten Weltkrieges im Jahr 1939. Sein Regime verübte den Holocaust, bei dem sechs Millionen Juden sowie Millionen anderer, die vom Nazi-Staat als unerwünscht angesehen wurden, systematisch in Konzentrationslagern ermordet wurden. Der Krieg selbst führte zum Tod von über 60 Millionen Menschen weltweit, zu massiver Zerstörung in ganz Europa und zu bedeutenden politischen, sozialen und wirtschaftlichen Folgen. Nach dem Krieg wurde Deutschland von den Alliierten besetzt und aufgeteilt, was schließlich zur Teilung in Ost- und Westdeutschland führte. Hitlers Handlungen veränderten die globale Geopolitik grundlegend, führten zur Gründung der Vereinten Nationen und bereiteten den Weg für den Kalten Krieg.</p> </div> <div data-bbox="1047 1568 1166 1596"> <p><b>True/False</b></p> </div> <div data-bbox="1047 1606 1446 1686"> <p><b>Ques:</b> Hat die Person auf dem Bild eine bedeutende Rolle im Zweiten Weltkrieg gespielt?<br/>Did the person in the image play a significant role in World War II?)<br/><b>Ans:</b> Wahr (TRUE)</p> </div>                                                                                                                 |

Fig. A. 11. Qualitative examples of various question types in Italian and German Language.



|                                                                                                                                                                                                     |                                                                                                                                                                                                                                                                                                                                                                                                                                                                                                                                                                                                                                                                                                                                                                                                                                                                                                                                                                                                                                                                                                                                                                                                                                                                                                                                                                                                                                                                                                                                                                                                                                                                                                                                                                                                                                                                                                                                                                                                                                                                                                                                                                                                                                                                                                                                                                                                                                                                                                                                                                                                                                                                                                                                                                                                                                                                                                                                                                                                  |
|-----------------------------------------------------------------------------------------------------------------------------------------------------------------------------------------------------|--------------------------------------------------------------------------------------------------------------------------------------------------------------------------------------------------------------------------------------------------------------------------------------------------------------------------------------------------------------------------------------------------------------------------------------------------------------------------------------------------------------------------------------------------------------------------------------------------------------------------------------------------------------------------------------------------------------------------------------------------------------------------------------------------------------------------------------------------------------------------------------------------------------------------------------------------------------------------------------------------------------------------------------------------------------------------------------------------------------------------------------------------------------------------------------------------------------------------------------------------------------------------------------------------------------------------------------------------------------------------------------------------------------------------------------------------------------------------------------------------------------------------------------------------------------------------------------------------------------------------------------------------------------------------------------------------------------------------------------------------------------------------------------------------------------------------------------------------------------------------------------------------------------------------------------------------------------------------------------------------------------------------------------------------------------------------------------------------------------------------------------------------------------------------------------------------------------------------------------------------------------------------------------------------------------------------------------------------------------------------------------------------------------------------------------------------------------------------------------------------------------------------------------------------------------------------------------------------------------------------------------------------------------------------------------------------------------------------------------------------------------------------------------------------------------------------------------------------------------------------------------------------------------------------------------------------------------------------------------------------|
| <div data-bbox="292 388 565 468" data-label="Text"> <p><b>Language: Spanish</b><br/><b>Category: Customs</b></p> </div> <div data-bbox="219 495 604 783" data-label="Image"> </div>                 | <div data-bbox="662 310 1013 340" data-label="Section-Header"> <p><b>Multiple Choice Question Answers</b></p> </div> <div data-bbox="662 348 1032 506" data-label="Text"> <p><b>Ques:</b> ¿En qué ciudad se está llevando a cabo este evento?<br/>(In which city is this event taking place?)<br/><b>Options:</b><br/>A) Barcelona, España (Barcelona, Spain)<br/>B) Madrid, España (Madrid, Spain)<br/>C) Sevilla, España (Seville, Spain)<br/>D) Bilbao, España (Bilbao, Spain)</p> </div> <div data-bbox="662 514 1032 684" data-label="Text"> <p><b>Ques:</b> ¿Qué papel desempeña la persona con el traje tradicional en este evento?<br/>(What role does the person in the traditional costume play in this event?)<br/><b>Options:</b><br/>A) Matador (Matador)<br/>B) Picador (Picador)<br/>C) Banderillero (Banderillero)<br/>D) Rejoneador (Rejoneador)</p> </div> <div data-bbox="662 693 1032 814" data-label="Text"> <p><b>True/False</b><br/><b>Ques:</b> ¿El evento representado en la imagen es una corrida de toros?<br/>(Is the event depicted in the image a traditional Spanish bullfight?)<br/><b>Ans:</b> Verdadero (TRUE)</p> </div> <div data-bbox="662 827 883 854" data-label="Section-Header"> <p><b>Short Question Answer</b></p> </div> <div data-bbox="662 865 1032 947" data-label="Text"> <p><b>Ques:</b> ¿Qué tipo de evento se muestra en la imagen?<br/>(What type of event is shown in the image?)<br/><b>Ans:</b> La imagen muestra una corrida de toros.<br/>(The image shows a bullfight.)</p> </div> <div data-bbox="1049 310 1279 340" data-label="Section-Header"> <p><b>Long Question Answer</b></p> </div> <div data-bbox="1049 348 1451 814" data-label="Text"> <p><b>Ques:</b> Explica la importancia de las corridas de toros en la cultura española, especialmente su historia, los roles involucrados en una corrida, y cómo es vista en la sociedad española contemporánea.<br/>(Explain the significance of bullfighting in Spanish culture, particularly its history, the roles involved in a bullfight, and how it is viewed in contemporary Spanish society.)<br/><b>Ans:</b><br/>Las corridas de toros, conocidas como 'corrida de toros', han sido una parte significativa de la cultura española durante siglos, con orígenes que se remontan a la antigua Roma. Involucra una serie de etapas, cada una con roles específicos: el matador, que realiza la estocada final; los picadores, que debilitan al toro; y los banderilleros, que colocan palos coloridos (banderillas) en el toro. A pesar de sus profundas raíces históricas y su fuerte presencia en las tradiciones y festivales españoles, las corridas de toros se han convertido en un tema controvertido en la España moderna. Algunas regiones, como Cataluña, las han prohibido, reflejando un cambio en los valores sociales donde los derechos de los animales y las consideraciones éticas están tomando precedencia sobre las prácticas tradicionales.</p> </div> |
| <div data-bbox="251 1108 571 1188" data-label="Text"> <p><b>Language: Emirati Arabic</b><br/><b>Category: Architecture</b></p> </div> <div data-bbox="194 1215 628 1503" data-label="Image"> </div> | <div data-bbox="662 1031 1013 1060" data-label="Section-Header"> <p><b>Multiple Choice Question Answers</b></p> </div> <div data-bbox="662 1068 1032 1226" data-label="Text"> <p><b>Ques:</b> من هو المعماري الذي صمم جناح الإمارات في الصورة؟<br/>(Which architect designed the UAE Pavilion shown in the image?)<br/><b>Options:</b><br/>A) Santiago Calatrava سانتياغو كالاترافا<br/>B) Frank Gehry فرانك جيري<br/>C) Zaha Hadid زها حديد<br/>D) Norman Foster نورمان فوستر</p> </div> <div data-bbox="662 1243 1032 1400" data-label="Text"> <p><b>Ques:</b> شو هو الإلهام المتوقع لتصميم جناح الإمارات؟<br/>(What inspiration is most likely behind the design of the UAE Pavilion?)<br/><b>Options:</b><br/>A) Falcon wings أجنحة الصقر<br/>B) Waves الأمواج<br/>C) Mountains الجبال<br/>D) Palm trees أشجار النخيل</p> </div> <div data-bbox="662 1413 1032 1514" data-label="Text"> <p><b>True/False</b><br/><b>Ques:</b> هل يعكس تصميم جناح الإمارات عناصر إماراتية تقليدية؟<br/>(Does the design of the UAE Pavilion reflect traditional Emirati elements?)<br/><b>Ans:</b> صحيح، يعكس (TRUE, it does)</p> </div> <div data-bbox="662 1547 899 1577" data-label="Section-Header"> <p><b>Short Question Answer</b></p> </div> <div data-bbox="662 1585 1032 1667" data-label="Text"> <p><b>Ques:</b> شو موجود في الصورة؟<br/>(What is depicted in the image?)<br/><b>Ans:</b> الصورة تبين جناح الإمارات التي صممها سانتياغو كالاترافا.<br/>(The image shows Santiago Calatrava's UAE Pavilion.)</p> </div> <div data-bbox="1049 1031 1279 1060" data-label="Section-Header"> <p><b>Long Question Answer</b></p> </div> <div data-bbox="1049 1068 1451 1667" data-label="Text"> <p><b>Ques:</b> تكلم عن كيف يعكس تصميم سانتياغو كالاترافا جناح الإمارات في إكسبو 2020 تطلعات وتراث دولة الإمارات الثقافي 2020 إكسبو<br/>(Discuss how Santiago Calatrava's architectural design of the UAE Pavilion at Expo 2020 reflects the aspirations and cultural heritage of the United Arab Emirates.)<br/><b>Ans:</b><br/>تصميم سانتياغو كالاترافا لجناح الإمارات في إكسبو 2020 يعتبر معجزة معمارية حديثة تعكس طموحات وتراث الإمارات الثقافي. الهيكل الذي تشبه الأجنحة مستوحاة من حركة الصقور في الطيران، التي لها رمزية ثقافية ووطنية كبيرة في الإمارات، وتمثل القوة والتراث والروح الطموحة للدولة. التصميم المبتكر للجناح يعبر عن رؤية الإمارات المستقبلية، وبين التزامها بالاستدامة والتكنولوجيا والتطور مع حفاظها على تقاليدها الثقافية العريقة. هالمزيج بين التصميم العصري والرمزية الثقافية يبرز الهوية الديناميكية للإمارات على مستوى العالم.</p> </div>                                                                                                                                                                                                                                                                                                                                                                                                                                   |

Fig. A. 12. Qualitative examples of various question types in Spanish and Emirati Arabic Language.

|                                                                                                                                                         |                                                                                                                                                                                                                                                                                                                                                                                                                                                                                                                                                                                                                                                                                                                                                                                                                                                                                                                                                                                                    |                                                                                                                                                                                                                                                                                                                                                                                                                                                                                                                                                                                                                                                                                                                                                                                                                                                                                                                                                                                                                                                                                                                                                                                                                                                                                                                                                                                                                                                                                                                                                                                                                                                                                                                                                                                     |
|---------------------------------------------------------------------------------------------------------------------------------------------------------|----------------------------------------------------------------------------------------------------------------------------------------------------------------------------------------------------------------------------------------------------------------------------------------------------------------------------------------------------------------------------------------------------------------------------------------------------------------------------------------------------------------------------------------------------------------------------------------------------------------------------------------------------------------------------------------------------------------------------------------------------------------------------------------------------------------------------------------------------------------------------------------------------------------------------------------------------------------------------------------------------|-------------------------------------------------------------------------------------------------------------------------------------------------------------------------------------------------------------------------------------------------------------------------------------------------------------------------------------------------------------------------------------------------------------------------------------------------------------------------------------------------------------------------------------------------------------------------------------------------------------------------------------------------------------------------------------------------------------------------------------------------------------------------------------------------------------------------------------------------------------------------------------------------------------------------------------------------------------------------------------------------------------------------------------------------------------------------------------------------------------------------------------------------------------------------------------------------------------------------------------------------------------------------------------------------------------------------------------------------------------------------------------------------------------------------------------------------------------------------------------------------------------------------------------------------------------------------------------------------------------------------------------------------------------------------------------------------------------------------------------------------------------------------------------|
| <div data-bbox="264 384 558 468"> <p><b>Language:</b> Saudi Arabic</p> <p><b>Category:</b> Media</p> </div> <div data-bbox="261 499 558 848"> </div>    | <div data-bbox="667 310 1013 338"> <p><b>Multiple Choice Question Answers</b></p> </div> <div data-bbox="667 348 1040 506"> <p><b>Ques:</b> من هو أحد الممثلين في المسلسل التلفزيوني سكة سفر؟<br/>(Who is one of the actors in the TV series Sekket Safar?)</p> <p><b>Options:</b></p> <p>A) Mohammed Al-Shehri محمد الشهري<br/>B) Nasser Al Qasabi ناصر القصبي<br/>C) Abdulmohsen Al-Nemr عبدالمحسن النمر<br/>D) Rashed Essa راشد عيسى</p> </div> <div data-bbox="667 516 1040 667"> <p><b>Ques:</b> ما هو نوع المسلسل التلفزيوني سكة سفر؟<br/>(What genre is the TV series Sekket Safar?)</p> <p><b>Options:</b></p> <p>A) Comedy كوميديا<br/>B) Drama دراما<br/>C) Horror رعب<br/>D) Thriller إثارة</p> </div> <div data-bbox="667 678 781 705"> <p><b>True/False</b></p> </div> <div data-bbox="667 716 1040 768"> <p><b>Ques:</b> هل سكة سفر هو مسلسل تلفزيوني عُرض في عام 2022؟<br/>(Is Sekket Safar a TV series that aired in 2022?)</p> <p><b>Ans:</b> صحيح (TRUE)</p> </div>              | <div data-bbox="1052 310 1279 338"> <p><b>Long Question Answer</b></p> </div> <div data-bbox="1052 348 1451 667"> <p><b>Ques:</b> ناقش الأهمية الثقافية والترفيهية لمسلسل سكة سفر في المملكة العربية السعودية وتصويره لأنماط الحياة MBC السعودية، بالنظر إلى إنتاجه من قبل السعودية.</p> <p><b>Ans:</b> سكة سفر هو مسلسل كوميدي أنتجته MBC في عام 2022 ، يحمل أهمية ثقافية وترفيهية كبيرة في المملكة العربية السعودية. يصور المسلسل جوانب متنوعة من الحياة والثقافة السعودية، مقدماً للمشاهدين نظرة طريفة ومعبرة عن العادات المحلية والأعراف الاجتماعية والتجارب اليومية. يبرز المسلسل، الذي يشارك فيه ممثلون مثل محمد الشهري وسعد عزيز وصالح أبو عمرو، نمو صناعة الترفيه في المنطقة. إنتاج المسلسل من قبل شبكة رائدة مثل MBC يضمن جودة محتوى عالية تتفاعل مع الجمهور السعودي، مما يعكس قصصهم ويوفر لهم ترفيحاً مرتبطاً بهم. لذا، يسهم سكة سفر في تنوع وإثراء المشهد الإعلامي السعودي.</p> </div> <div data-bbox="667 831 899 858"> <p><b>Short Question Answer</b></p> </div> <div data-bbox="667 869 1040 947"> <p><b>Ques:</b> ما هو عنوان المسلسل التلفزيوني المعروض في الصورة؟<br/>(What is the title of the TV series shown in the image?)</p> <p><b>Ans:</b> سكة سفر<br/>(Sekket Safar)</p> </div> <div data-bbox="1052 869 1451 947"> <p><b>Ques:</b> أي شبكة تلفزيونية أنتجت المسلسل التلفزيوني في الصورة؟<br/>(Which TV network produced the TV series in the image?)</p> <p><b>Ans:</b> MBC<br/>(MBC)</p> </div>                                                                                                                                                                                                                                                                                                                                                         |
| <div data-bbox="289 1104 558 1188"> <p><b>Language:</b> Afrikaans</p> <p><b>Category:</b> Economy</p> </div> <div data-bbox="190 1257 634 1461"> </div> | <div data-bbox="667 1031 1013 1058"> <p><b>Multiple Choice Question Answers</b></p> </div> <div data-bbox="667 1068 1040 1226"> <p><b>Ques:</b> Watter stad in Suid-Afrika word op die beeld uitgebeeld?<br/>(What South African city is depicted in the image?)</p> <p><b>Options:</b></p> <p>A) Johannesburg (Johannesburg)<br/>B) Kaapstad (Cape Town)<br/>C) Durban (Durban)<br/>D) Pretoria (Pretoria)</p> </div> <div data-bbox="667 1247 1040 1398"> <p><b>Ques:</b> In watter bedryf is Johannesburg veral bekend?<br/>(Which industry is Johannesburg widely known for?)</p> <p><b>Options:</b></p> <p>A) Mynbou (Mining)<br/>B) Landbou (Agriculture)<br/>C) Toerisme (Tourism)<br/>D) Mode (Fashion)</p> </div> <div data-bbox="667 1419 773 1446"> <p><b>True/False</b></p> </div> <div data-bbox="667 1457 1040 1509"> <p><b>Ques:</b> Die beeld toon die skyline van Johannesburg.<br/>(The image represents the skyline of Johannesburg.)</p> <p><b>Ans:</b> Waar (TRUE)</p> </div> | <div data-bbox="1052 1031 1279 1058"> <p><b>Long Question Answer</b></p> </div> <div data-bbox="1052 1068 1451 1509"> <p><b>Ques:</b> Verduidelik die rol van Johannesburg in die Suid-Afrikaanse ekonomie, met spesifieke klem op sy historiese agtergrond in mynbou en ander belangrike ekonomiese sektore wat tot sy welvaart bydra.<br/>(Explain the significance of Johannesburg in South Africa's economy, highlighting its historical background in mining and other major economic industries that contribute to its prosperity.)</p> <p><b>Ans:</b> Johannesburg, dikwels beskryf as die ekonomiese spilpunt van Suid-Afrika, het vinnig gegroei na die ontdekking van goud in die laat 19de eeu en het steeds 'n noemenswaardige ekonomiese rol. Behalwe mynbou, het Johannesburg oor tyd gediversifiseer na ander sektore, insluitend finansies, vervaardiging, telekommunikasie en kleinhandel. Die stad huisves die Johannesburgse Effektebeurs (JSE), wat sy finansiële markposisie versterk. Met sy skyline as simbool van 'n moderne en dinamiese ekonomie, trek Johannesburg beleggers plaaslik en internasionaal, en speel dit 'n sleutelrol in Suid-Afrika se ekonomiese landskap.</p> </div> <div data-bbox="667 1556 899 1583"> <p><b>Short Question Answer</b></p> </div> <div data-bbox="667 1593 1040 1671"> <p><b>Ques:</b> Watter stad word as hoofstad op die beeld vertoon?<br/>(What is the main city shown in the image?)</p> <p><b>Ans:</b> Johannesburg<br/>(Johannesburg)</p> </div> <div data-bbox="1052 1593 1451 1671"> <p><b>Ques:</b> Watter toringagtige struktuur is prominent op die beeld?<br/>(Which structure is prominently featured with a tower-like design?)</p> <p><b>Ans:</b> Die Hillbrow Toring (The Hillbrow Tower)</p> </div> |

Fig. A. 13. Qualitative examples of various question types in Saudi Arabic and Afrikaans Language.

South Africa-Afrikaans

Category: Music



Short Question Answers

Waarop speel die Hausa-musikante in hierdie beeld?  
(What are Hausa musicians in this image performing on?)

Hulle speel op verskeie tradisionele instrumente, insluitend dié wat van dierehorings gemaak is.  
(They are performing on various traditional instruments, including those made from animal horns.)

Italy- Italian

Category: Food



True False

Descrivi gli ingredienti tipici e il metodo di preparazione della Zuppa di Minestrone raffigurata nell'immagine.  
(The bread shown in the image is a type of Italian bread.)

Vero (True)

France-French

Category: Heritage



Multiple Choice Question Answers

Comment s'appelle le monument dans l'image?  
(What is the monument in the image called?)

a) cathédrale Notre-Dame de Paris (Cathedral Notre-Dame of Paris)  
b) Tour Eiffel (Eiffel Tower)  
c) Arc de Triomphe, (Arc de Triomphe)  
d) Pyramide du Louvre (Louvre Pyramid)

China-Chinese Simplified

Category: Media



Short Question Answers

(哪个电视频道播出“中国好声音”?)  
(Which television network broadcasts 'The Voice of China'?)

浙江电视台  
(Zhejiang Television)

India-Hindi

Category: Religion



Short Question Answers

इस चित्र में कौन सा त्यौहार मनाया जा रहा है?  
(What festival is being celebrated in this image?)

मेवाड़ महोत्सव.  
(The Mewar Festival.)

Germany-German

Category: Literature



True False

Befindet sich die Skulptur im Bild in Dresden?  
(Is the sculpture in the image located in Dresden?.)

Falsch (False)

Bulgaria-Bulgarian

Category: Architecture



Multiple Choice Question Answers

Каква традиционна архитектурна особеност може да се види в сградата отляво?  
(What traditional architectural feature can be observed in the building on the left?)

a) Сградата отляво се отличава с богато украсени дървени резби и цветни фрески. (The building on the left features ornate wooden carvings and colorful frescoes. ✓  
b) Минималистични бетонни конструкции (Minimalist concrete structures) ✗

Russia-Russian

Category: Festivals



Short Question Answers

Что изображено на картинке?  
(What is depicted in the image?)

На изображении изображено празднование Масленицы с центральной фигурой, олицетворяющей Масленицу в традиционной одежде.  
(The image images a celebration of Maslennitsa with a central figure representing Maslennitsa in traditional clothing.)

India-Marathi

Category: Notable key figures



Short Question Answers

शिवाजीचा पुतळा कोठे आहे?  
(Where is this statue of Shivaji located at Raigarh Fort in Maharashtra, India.)

हा शिवाजीचा पुतळा भारतातील महाराष्ट्रातील रायगड किल्ल्यावर आहे  
(This statue of Shivaji is located at Raigarh Fort in Maharashtra, India.)

Kazakhstan-Kazakh

Category: Economy



True False

Байтерек монументі Қазақстанда орналасқан ба?  
(Is the Baiterek monument located in Kazakhstan?)

ШЫН (True)

Sri Lanka-Sinhala

Category: Customs



Multiple Choice Question Answers

මෙම රූපයේ සිටින මධ්‍යම යුගලයේ වම් පසින් සාම්ප්‍රදායික ඇඳුමින් සැරසී සිටින යුද්ගලයන් බොහෝ විට නිවැරදිව කැටයම් කර ඇත්ද?  
(Who are the people in traditional attire to the left of the central couple in this image most likely representing?)

a) සාම්ප්‍රදායික මෙර වැදකයින් සහ නර්තකයින් (Traditional drummers and dancers) ✓  
b) විවාහ අමුත්තන් (Wedding guests) ✗  
c) යුගලයේ පවුලේ සාමාජිකයන් (Family members of the couple) ✗

Bangladesh-Bengali

Category: Customs



Short Question Answers

বাচ্চারা ছবিতে কি খেলা খেলছে?  
(What game are the kids playing in the image?)

কঁচা উর বোঁপাড়া  
(Jumping over thorns.)

Fig. A. 14. Some more qualitative examples of various question types from our benchmark.







| S#No | Language            | Country              | Script     | Family         | Subgrouping       | Specification |
|------|---------------------|----------------------|------------|----------------|-------------------|---------------|
| 1    | Afrikaans           | South Africa         | Latin      | Indo-European  | Germanic          | High          |
| 2    | Albanian            | Albania              | Latin      | Indo-European  | Albanian          | High          |
| 3    | Amharic             | Ethiopia             | Ge'ez      | Afro-Asiatic   | Semitic           | Low           |
| 4    | Armenian            | Armenia              | Armenian   | Indo-European  | Armenic           | Low           |
| 5    | Assamese            | India                | Bengali    | Indo-European  | Indo-Aryan        | Low           |
| 6    | Azerbaijani         | Azerbaijan           | Latin      | Turkic         | Common Turkic     | Low           |
| 7    | Basque              | Spain                | Latin      | Isolate        | –                 | High          |
| 8    | Belarusian          | Belarus              | Cyrillic   | Indo-European  | Balto-Slavic      | Low           |
| 9    | Bengali             | Bangladesh           | Bengali    | Indo-European  | Indo-Aryan        | High          |
| 10   | Bhojpuri            | India                | Devanagari | Indo-European  | Indo-Aryan        | Low           |
| 11   | Bosnian             | Bosnia               | Latin      | Indo-European  | Balto-Slavic      | High          |
| 12   | Bulgarian           | Bulgaria             | Cyrillic   | Indo-European  | Balto-Slavic      | High          |
| 13   | Catalan             | Spain                | Latin      | Indo-European  | Italic            | High          |
| 14   | Cebuano             | Philippines          | Latin      | Austronesian   | Malayo-Polynesian | Low           |
| 15   | Chinese Simplified  | China                | Chinese    | Sino-Tibetan   | Sinitic           | High          |
| 16   | Chinese Traditional | Hong Kong            | Chinese    | Sino-Tibetan   | Sinitic           | High          |
| 17   | Croatian            | Croatia              | Latin      | Indo-European  | Balto-Slavic      | High          |
| 18   | Czech               | Czech Republic       | Latin      | Indo-European  | Balto-Slavic      | High          |
| 19   | Danish              | Denmark              | Latin      | Indo-European  | Germanic          | High          |
| 20   | Dutch               | Netherlands          | Latin      | Indo-European  | Germanic          | High          |
| 21   | Egyptian Arabic     | Egypt                | Arabic     | Afro-Asiatic   | Semitic           | Low           |
| 22   | Emirati Arabic      | United Arab Emirates | Arabic     | Afro-Asiatic   | Semitic           | High          |
| 23   | English             | United Kingdom       | Latin      | Indo-European  | Germanic          | High          |
| 24   | Estonian            | Estonia              | Latin      | Uralic         | Finnic            | High          |
| 25   | Filipino            | Philippines          | Latin      | Austronesian   | Malayo-Polynesian | Low           |
| 26   | Finish              | Finland              | Latin      | Uralic         | Finnic            | High          |
| 27   | French              | France               | Latin      | Indo-European  | Italic            | High          |
| 28   | Galician            | Spain                | Latin      | Indo-European  | Italic            | Low           |
| 29   | Georgian            | Georgia              | Georgian   | Kartvelian     | Kartvelian        | Low           |
| 30   | German              | Germany              | Latin      | Indo-European  | Germanic          | High          |
| 31   | Greek               | Greece               | Greek      | Indo-European  | Graeco-Phrygian   | High          |
| 32   | Gujarati            | India                | Gujarati   | Indo-European  | Indo-Aryan        | Low           |
| 33   | Hausa               | Nigeria              | Latin      | Afro-Asiatic   | Chadic            | Low           |
| 34   | Hawaiian            | United States        | Latin      | Austronesian   | Malayo-Polynesian | Low           |
| 35   | Hebrew              | Israel               | Hebrew     | Afro-Asiatic   | Semitic           | High          |
| 36   | Hindi               | India                | Devanagari | Indo-European  | Indo-Aryan        | High          |
| 37   | Hungarian           | Hungary              | Latin      | Uralic         | –                 | High          |
| 38   | Icelandic           | Iceland              | Latin      | Indo-European  | Germanic          | High          |
| 39   | Igbo                | Nigeria              | Latin      | Atlantic-Congo | Benue-Congo       | Low           |
| 40   | Indonesian          | Indonesia            | Latin      | Austronesian   | Malayo-Polynesian | High          |
| 41   | Irish               | Ireland              | Latin      | Indo-European  | Celtic            | Low           |
| 42   | Italian             | Italy                | Latin      | Indo-European  | Italic            | High          |
| 43   | Japanese            | Japan                | Kanji/Kana | Japonic        | Japanese Ryukyuan | High          |
| 44   | Javanese            | Indonesia            | Latin      | Austronesian   | Malayo-Polynesian | Low           |
| 45   | Kannada             | India                | Kannada    | Dravidian      | South Dravidian   | Low           |
| 46   | Kazakh              | Kazakhstan           | Cyrillic   | Turkic         | Common Turkic     | High          |
| 47   | Kinyarwanda         | Rwanda               | Latin      | Atlantic-Congo | Benue-Congo       | Low           |
| 48   | Korean              | South Korea          | Hangul     | Koreanic       | Korean            | High          |
| 49   | Kurdish             | Turkey               | Arabic     | Indo-European  | Iranian           | Low           |
| 50   | Kyrgyz              | Kyrgyzstan           | Cyrillic   | Turkic         | Common Turkic     | Low           |

| S#No | Language          | Country         | Script     | Family           | Subgrouping       | Specification |
|------|-------------------|-----------------|------------|------------------|-------------------|---------------|
| 51   | Lao               | Thailand        | Lao        | Tai-Kadai        | Kra-Dai           | Low           |
| 52   | Latin             | Vatican City    | Latin      | Indo-European    | Italic            | Low           |
| 53   | Latvian           | Latvia          | Latin      | Indo-European    | Balto-Slavic      | High          |
| 54   | Lithuanian        | Lithuania       | Latin      | Indo-European    | Balto-Slavic      | High          |
| 55   | Luxembourgish     | Luxembourg      | Latin      | Indo-European    | Germanic          | Low           |
| 56   | Macedonian        | North Macedonia | Cyrillic   | Indo-European    | Balto-Slavic      | High          |
| 57   | Malagasy          | Madagascar      | Latin      | Austronesian     | Malayo-Polynesian | Low           |
| 58   | Malay             | Malaysia        | Latin      | Austronesian     | Malayo-Polynesian | High          |
| 59   | Malayalam         | India           | Malayalam  | Dravidian        | South Dravidian   | Low           |
| 60   | Maltese           | Malta           | Latin      | Afro-Asiatic     | Semitic           | High          |
| 61   | Marathi           | India           | Devanagari | Indo-European    | Indo-Aryan        | Low           |
| 62   | Mongolian         | Mongolia        | Cyrillic   | Mongolic-Khitani | Mongolic          | Low           |
| 63   | Myanmar (Burmese) | Myanmar         | Myanmar    | Sino-Tibetan     | Burmo-Qiangic     | Low           |
| 64   | Nepali            | Nepal           | Devanagari | Indo-European    | Indo-Aryan        | Low           |
| 65   | Norwegian         | Norway          | Latin      | Indo-European    | Germanic          | Low           |
| 66   | Odia (Oriya)      | India           | Oriya      | Indo-European    | Indo-Aryan        | Low           |
| 67   | Pashto            | Pakistan        | Arabic     | Indo-European    | Iranian           | Low           |
| 68   | Persian           | Iran            | Arabic     | Indo-European    | Iranian           | High          |
| 69   | Polish            | Poland          | Latin      | Indo-European    | Balto-Slavic      | High          |
| 70   | Portuguese        | Portugal        | Latin      | Indo-European    | Italic            | High          |
| 71   | Punjabi           | Pakistan        | Gurmukhi   | Indo-European    | Indo-Aryan        | Low           |
| 72   | Romanian          | Romania         | Latin      | Indo-European    | Italic            | High          |
| 73   | Russian           | Russia          | Cyrillic   | Indo-European    | Balto-Slavic      | High          |
| 74   | Sanskrit          | India           | Devanagari | Indo-European    | Indo-Aryan        | Low           |
| 75   | Saudi Arabic      | Saudi Arabia    | Arabic     | Afro-Asiatic     | Semitic           | High          |
| 76   | Scots Gaelic      | Scotland        | Latin      | Indo-European    | Celtic            | Low           |
| 77   | Serbian           | Serbia          | Cyrillic   | Indo-European    | Balto-Slavic      | Low           |
| 78   | Shona             | Zimbabwe        | Latin      | Atlantic-Congo   | Benue-Congo       | Low           |
| 79   | Sindhi            | Pakistan        | Arabic     | Indo-European    | Indo-Aryan        | Low           |
| 80   | Sinhala           | Sri Lanka       | Sinhala    | Indo-European    | Indo-Aryan        | Low           |
| 81   | Slovak            | Slovakia        | Latin      | Indo-European    | Balto-Slavic      | High          |
| 82   | Slovenian         | Slovenia        | Latin      | Indo-European    | Balto-Slavic      | High          |
| 83   | Somali            | Somalia         | Latin      | Afro-Asiatic     | Cushitic          | Low           |
| 84   | Spanish           | Spain           | Latin      | Indo-European    | Italic            | High          |
| 85   | Sundanese         | Indonesia       | Latin      | Austronesian     | Malayo-Polynesian | Low           |
| 86   | Swahili           | Tanzania        | Latin      | Atlantic-Congo   | Benue-Congo       | High          |
| 87   | Swedish           | Sweden          | Latin      | Indo-European    | Germanic          | High          |
| 88   | Tajik             | Tajikistan      | Cyrillic   | Indo-European    | Iranian           | Low           |
| 89   | Tamil             | India           | Tamil      | Dravidian        | South Dravidian   | Low           |
| 90   | Telugu            | India           | Telugu     | Dravidian        | South Dravidian   | Low           |
| 91   | Thai              | Thailand        | Thai       | Tai-Kadai        | Kam-Tai           | High          |
| 92   | Turkish           | Turkey          | Latin      | Turkic           | Common Turkic     | High          |
| 93   | Ukrainian         | Ukraine         | Cyrillic   | Indo-European    | Balto-Slavic      | High          |
| 94   | Urdu              | Pakistan        | Arabic     | Indo-European    | Indo-Aryan        | Low           |
| 95   | Uyghur            | China           | Arabic     | Turkic           | Common Turkic     | Low           |
| 96   | Uzbek             | Uzbekistan      | Latin      | Turkic           | Common Turkic     | High          |
| 97   | Vietnamese        | Vietnam         | Latin      | Austroasiatic    | Vietic            | High          |
| 98   | Welsh             | United Kingdom  | Latin      | Indo-European    | Celtic            | Low           |
| 99   | Yiddish           | Israel          | Hebrew     | Indo-European    | Germanic          | Low           |
| 100  | Yoruba            | Nigeria         | Latin      | Atlantic-Congo   | Benue-Congo       | Low           |

Table A. 3. A comprehensive list of 100 languages, their associated country, language scripts, families, subgrouping, and the resource specification.

We thank reviewers for positive feedback: attempts to improve data quality incl. native speakers verification (**C9ZZ**, **ic3S**, **KCcs**), being diverse, and incl. culturally relevant content (**C9ZZ**), comprehensive and valuable VQA benchmark (**ic3S**), significant efforts towards linguistic diversity, esp. for low-resource languages, extensive 13 distinct cultural categories (**KCcs**). Our **code & dataset** will be made public. All suggested changes will be reflected in final draft.

**C9ZZ: On conflating “Language” and “Culture”:** We agree that the mapping is not one-to-one for each language and its respective culture. The suggestion to explore many-to-many mappings is indeed a valuable direction for future work. However, to ensure the curation of high-quality cultural samples on a larger scale for our multilingual multimodal benchmark, we adopted a simplified assumption by restricting mappings to a single <country-language> pair. The mappings are in the suppl. mat. (Tab. A.3), we will clarify this approach further in the final draft.

**ic3S: On using GPT-4o for automatic evaluation:** We have also evaluated a sample of 20 languages on True/False and MCQs using LLaMA-3.1-8B-Instruct to ensure reproducible and consistent results on *GPT-4o*, *Gemini-1.5-Pro*, and *GLM-4V-9B*. We show these results in the suppl. (Tab. A.2). As recommended, we conducted a **Human Evaluation** on a randomly selected subset of 100 samples across 8 languages. The results (Fig. 16) show the comparable scores of GPT-4o to human evaluation, verifying the effectiveness of LLM-as-a-judge in ALM-bench. **Higher performance of Long-VQAs compared to Short-VQAs:** Each question type was evaluated on different criteria as mentioned in L275-L286. While short questions are evaluated solely on *correctness*, long questions are assessed on *consistency*, *fluency*, and *relevancy*. The inclusion of *fluency* and *consistency* in evaluating long questions favor LLMs, as instruction tuning and RLHF alignment make the responses inherently more coherent and well-structured. Moreover, long responses allow the model to capture a broad range of information, increasing the likelihood of partial correctness (covered under relevancy) in a multilingual setting, even if some parts are incorrect. Existing work [6,25,43] also uses similar criteria to evaluate long questions. **Purpose of General VQA in ALM-Bench:** The inclusion of General VQA in ALM-bench establishes a baseline for evaluating multilingual visual understanding in 100 languages. It ensures models perform well on generic, universally relevant scenes (e.g., indoor and outdoor) w/o specific cultural nuances, allowing a comprehensive assessment of their visual and linguistic generalization capabilities. We also show **performance of general and cultural VQA separately** in Fig. 17. Since the general VQAs are only open-ended, we compare them with open-ended VQAs from the cultural part. Open-source

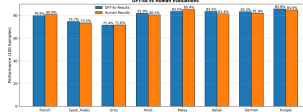

Fig. A. 16. Human vs GPT-4o performance comparison.

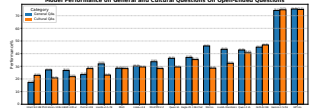

Fig. A. 17. Results of general vs cultural open-ended VQAs.

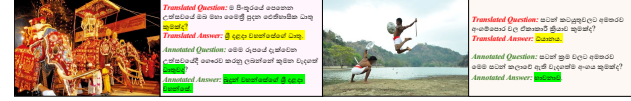

Fig. A. 18. Examples of human verification step on a low-resource language, *Sinhala* to ensure cultural relevance in ALM-bench.

models, like Qwen-2-VL and LLaVA-OneVision, perform better on general questions, highlighting challenges with culturally specific ones. In contrast, closed-source models show near-identical performance across both, indicating better handling of cultural aspects. **To ensure the filtration of misclassified culture** category-language pair sample, we have two strategies embedded in our verification protocol: 1) Each QA pair is assigned a unique (country, language, cultural domain) triplet to prevent mismatches, ensuring correct associations with a single language. 2) Human annotators verify these mappings to ensure consistency. We will clarify this in the main text. **Minors:** 1) We will elaborate on country-specific prompts in the final version. Our experiments used structured triplets (language, country, cultural domain) in prompts. E.g., **prompt = ques + “Provide brief, clear responses in ‘lang’ language. The image represents ‘cultural’ cat. in ‘country’.”** 2) The number of languages in each script in Fig. 7 is similar. We will update it in the revised version.

**KCcs: Performance variation in various cultural domains** stems from biases in LLM’s training data (salewski2023context) and vision backbones (zhang2023vitaev2), which typically favor well-represented cultures. Language nuances and instruction tuning also impact performance, with closed-source models often outperforming open-source ones due to better alignment with diverse datasets. To **better utilize visual cues**, aligning vision and language components with fine-grained training samples improves LMM performance. In multilingual settings, linking visual representations of rich scenes with diverse, multilingual data can strengthen LMM’s ability to interpret visual cues. **Leveraging error categories refines training and model arch.** Grammatical and semantic errors arise from limited multilingual data, highlighting the need for diverse datasets. Cultural errors reflect domain gaps, addressed by high-quality visual samples with detailed annotations. Incorporating these datasets during model training can significantly reduce errors. **Ensuring Cultural relevance in ALM-bench:** Our native experts verified and annotated misrepresented cultural concepts to ensure cultural accuracy across languages. We show an example in Fig. 18.

| No. | Author Name                 | Affiliation                                 | Email                             |
|-----|-----------------------------|---------------------------------------------|-----------------------------------|
| 1   | Henok Biadgign Ademtew      | Ethiopian Artificial Intelligence Institute | henokb2124@gmail.com              |
| 2   | Yahya Hmaiti                | University of Central Florida               | yohan.hmaiti@ucf.edu              |
| 3   | Amandeep Kumar              | Johns Hopkins University                    | kumar.amandeep015@gmail.com       |
| 4   | Kartik Kuckreja             | MBZUAI                                      | kartik.kuckreja@mbzuai.ac.ae      |
| 5   | Mykola Maslych              | University of Central Florida               | mykola.maslych@ucf.edu            |
| 6   | Wafa Al Ghallabi            | MBZUAI                                      | wafa.alghallabi@mbzuai.ac.ae      |
| 7   | Mihail Mihaylov             | MBZUAI                                      | mihail.mihaylov@mbzuai.ac.ae      |
| 8   | Chao Qin                    | MBZUAI                                      | 1746625542@qq.com                 |
| 9   | Abdelrahman M Shaker        | MBZUAI                                      | abdelrahman.youssief@mbzuai.ac.ae |
| 10  | Mike Zhang                  | Aalborg University                          | jjz@cs.aau.dk                     |
| 11  | Mahardika Krisna Ihsani     | MBZUAI                                      | mahardika.ihsani@mbzuai.ac.ae     |
| 12  | Amiel Esplana               | University of the West of England, Bristol  | amiel2.esplana@live.uwe.ac.uk     |
| 13  | Monil Gokani                | IIT, Hyderabad                              | monilgokani08@gmail.com           |
| 14  | Shachar Mirkin              | Alpinference                                | shacharmirkin@gmail.com           |
| 15  | Harsh Singh                 | MBZUAI                                      | harsh.singh@mbzuai.ac.ae          |
| 16  | Ashay Srivastava            | University of Maryland, College Park        | ashays06@umd.edu                  |
| 17  | Endre Hamerlik              | HUN-REN Institute for CS and Control        | hamerlik@sztaki.hu                |
| 18  | Fathinah Asma Izzati        | MBZUAI                                      | fathinah.izzati@mbzuai.ac.ae      |
| 19  | Fadillah Adamsyah Maani     | MBZUAI                                      | fadillah.maani@mbzuai.ac.ae       |
| 20  | Sebastian Cavada            | MBZUAI                                      | sebastian.cavada@mbzuai.ac.ae     |
| 21  | Jenny Chim                  | Queen Mary University of London, UK         | jennychim@gmail.com               |
| 22  | Rohit Gupta                 | University of Central Florida               | rohitgupta.hpf@gmail.com          |
| 23  | Sanjay Manjunath            | MBZUAI                                      | sanjay.manjunath@mbzuai.ac.ae     |
| 24  | Kamila Zhumakhanova         | MBZUAI                                      | kamila.zhumakhanova@mbzuai.ac.ae  |
| 25  | Feno Heriniaina Rabevohitra | Chongqing University                        | fenoheriniaina@gmail.com          |
| 26  | Azril Amirudin              | University of the People                    | azrilamirudin@my.uopeople.edu     |
| 27  | Muhammad Ridzuan            | MBZUAI                                      | 20020084@mbzuai.ac.ae             |
| 28  | Daniya Kareem               | MBZUAI                                      | daniya.kareem@mbzuai.ac.ae        |
| 29  | Ketan More                  | MBZUAI                                      | ketan.more@mbzuai.ac.ae           |
| 30  | Kunyang Li                  | University of Central Florida               | kunyang.li@ucf.edu                |
| 31  | Pramesh Shakya              | University of Central Florida               | pramesh.shakya@ucf.edu            |
| 32  | Muhammad Saad               | MBZUAI                                      | muhammad.saad@mbzuai.ac.ae        |
| 33  | Amirpouya Ghasemaghaei      | University of Central Florida               | aghaei.ap@ucf.edu                 |
| 34  | Amirbek Djanibekov          | MBZUAI                                      | amirbek.djanibekov@mbzuai.ac.ae   |
| 35  | Dilshod Azizov              | MBZUAI                                      | dilshod.azizov@mbzuai.ac.ae       |
| 36  | Branislava Jankovic         | MBZUAI                                      | branislava.jankovic@mbzuai.ac.ae  |
| 37  | Naman Bhatia                | Indian Institute of Technology, Hyderabad   | naman.219311175@muj.manipal.edu   |
| 38  | Alvaro Cabrera              | MBZUAI                                      | alvaro.berobide@mbzuai.ac.ae      |
| 39  | Johan Obando-Ceron          | University of Montreal, Mila                | jobando0730@gmail.com             |
| 40  | Olympiah Otieno             | JKUAT                                       | anikaolympiah@gmail.com           |
| 41  | Fabian Farestam             | ETHZ - ETH Zurich                           | ffarestam@student.ethz.ch         |
| 42  | Muztoba Rabbani             | University of California, Merced            | mrabbani@ucmerced.edu             |
| 43  | Sanoojan Baliah             | MBZUAI                                      | sanoojan.baliah@mbzuai.ac.ae      |
| 44  | Santosh Sanjeev             | MBZUAI                                      | santosh.sanjeev@mbzuai.ac.ae      |
| 45  | Abduragim Shtanchaev        | MBZUAI                                      | abduragim.shtanchaev@mbzuai.ac.ae |
| 46  | Maheen Fatima               | Air University                              | 231659@students.au.edu.pk         |
| 47  | Thao Nguyen                 | MBZUAI                                      | thao.nguyen@mbzuai.ac.ae          |
| 48  | Amrin Kareem                | MBZUAI                                      | amrin.kareem@mbzuai.ac.ae         |
| 49  | Toluwani Aremu              | MBZUAI                                      | toluwani.aremu@mbzuai.ac.ae       |
| 50  | Nathan Xavier               | Universidade Federal de Minas Gerais        | nathanxavier@ufmg.br              |
| 51  | Amit Bhatkal                | MBZUAI                                      | amitbhatkal12@gmail.com           |
| 52  | Hawau Olamide Toyin         | MBZUAI                                      | hawau.toyin@mbzuai.ac.ae          |

Table A. 4. List of affiliations for all the volunteer co-authors who contributed to construct ALM-Bench.
